# Supplementary material for: Water adsorption in SAPO-34: elucidating the role of local heterogeneities and defects using dispersion-corrected DFT calculations
Source: Royal Society of Chemistry journal article supplement (doi:10.1039/c5cp04189a), 2015-01-01
Supplement: c5cp04189a1.pdf [file c5cp04189a1.pdf]

**Water adsorption in SAPO-34: Elucidating the role of local heterogeneities  
and defects using dispersion-corrected DFT calculations**

*Michael Fischer*

Fachgebiet Kristallographie, Fachbereich Geowissenschaften, Universität Bremen,  
Klagenfurter Straße 2, 28359 Bremen, Germany

michael.fischer@uni-bremen.de

ELECTRONIC SUPPLEMENTARY INFORMATION

- (1) Snapshots at high water loadings: DFT-D interaction energies**
- (2) Visualisation of selected snapshots**
- (3) Typical CASTEP input files**

## (1) Snapshots at high water loadings: Interaction energies

Interaction energies obtained for individual snapshots for a loading of 30 H<sub>2</sub>O molecules per unit cell.

### a) SAPO-34\_O1

|            | $E_{int,aver} / \text{kJ mol}^{-1}$ | $E_{int,nodisp, aver} / \text{kJ mol}^{-1}$ |
|------------|-------------------------------------|---------------------------------------------|
| Snapshot 1 | -71.6                               | -50.6                                       |
| Snapshot 2 | -71.4                               | -50.5                                       |
| Snapshot 3 | -67.4                               | -46.1                                       |
| Snapshot 4 | -72.6                               | -51.6                                       |
| Snapshot 5 | -71.2                               | -50.5                                       |
| Average    | -70.9 +/- 2.0                       | -49.9                                       |

### b) SAPO-34\_O3

|            | $E_{int,aver} / \text{kJ mol}^{-1}$ | $E_{int,nodisp, aver} / \text{kJ mol}^{-1}$ |
|------------|-------------------------------------|---------------------------------------------|
| Snapshot 1 | -69.8                               | -48.9                                       |
| Snapshot 2 | -71.1                               | -50.6                                       |
| Snapshot 3 | -67.4                               | -45.9                                       |
| Snapshot 4 | -71.8                               | -50.6                                       |
| Snapshot 5 | -69.9                               | -48.6                                       |
| Average    | -70.0 +/- 1.6                       | -48.9                                       |

### c) SAPO-34\_Si\_island

|            | $E_{int,aver} / \text{kJ mol}^{-1}$ | $E_{int,nodisp, aver} / \text{kJ mol}^{-1}$ |
|------------|-------------------------------------|---------------------------------------------|
| Snapshot 1 | -70.6                               | -49.3                                       |
| Snapshot 2 | -69.7                               | -49.0                                       |
| Snapshot 3 | -70.0                               | -49.2                                       |
| Snapshot 4 | -73.0                               | -52.0                                       |
| Snapshot 5 | -70.2                               | -48.8                                       |
| Average    | -70.7 +/- 1.3                       | -49.7                                       |

**d) SAPO-34\_SiAl\_domain**

|            | $E_{int,aver} / \text{kJ mol}^{-1}$ | $E_{int,nodisp, aver} / \text{kJ mol}^{-1}$ |
|------------|-------------------------------------|---------------------------------------------|
| Snapshot 1 | -68.8                               | -47.6                                       |
| Snapshot 2 | -70.0                               | -49.1                                       |
| Snapshot 3 | -71.4                               | -50.7                                       |
| Snapshot 4 | -68.7                               | -48.1                                       |
| Snapshot 5 | -68.9                               | -47.7                                       |
| Average    | -69.6 +/- 1.2                       | -48.7                                       |

**e) SAPO-34\_defect+Si(OH)<sub>4</sub>**

|            | $E_{int,aver} / \text{kJ mol}^{-1}$ | $E_{int,nodisp, aver} / \text{kJ mol}^{-1}$ |
|------------|-------------------------------------|---------------------------------------------|
| Snapshot 1 | -69.4                               | -45.8                                       |
| Snapshot 2 | -72.2                               | -48.8                                       |
| Snapshot 3 | -70.3                               | -47.3                                       |
| Snapshot 4 | -69.7                               | -46.8                                       |
| Snapshot 5 | -72.4                               | -49.1                                       |
| Average    | -70.8 +/- 1.4                       | -47.6                                       |

**f) SAPO-34\_desilicated**

|            | $E_{int,aver} / \text{kJ mol}^{-1}$ | $E_{int,nodisp, aver} / \text{kJ mol}^{-1}$ |
|------------|-------------------------------------|---------------------------------------------|
| Snapshot 1 | -67.0                               | -44.3                                       |
| Snapshot 2 | -69.2                               | -47.1                                       |
| Snapshot 3 | -66.3                               | -43.7                                       |
| Snapshot 4 | -68.3                               | -46.5                                       |
| Snapshot 5 | -65.0                               | -42.2                                       |
| Average    | -67.2 +/- 1.7                       | -44.8                                       |

**g) AIPO-34**

|            | $E_{int,aver} / \text{kJ mol}^{-1}$ | $E_{int,nodisp, aver} / \text{kJ mol}^{-1}$ |
|------------|-------------------------------------|---------------------------------------------|
| Snapshot 1 | -62.8                               | -41.1                                       |
| Snapshot 2 | -63.4                               | -42.0                                       |
| Snapshot 3 | -63.7                               | -42.6                                       |
| Snapshot 4 | -63.8                               | -42.3                                       |
| Snapshot 5 | -63.7                               | -42.2                                       |
| Average    | -63.5 +/- 0.4                       | -42.0                                       |

## (2) Visualisation of selected snapshots

The following figures show selected DFT-D optimised structures of SAPO-34 systems with 30 H<sub>2</sub>O molecules per unit cell. Oxygen atoms of water molecules are shown in green to distinguish them from framework oxygen atoms.

SAPO-34\_O1 + 30 H<sub>2</sub>O (snapshot 4)

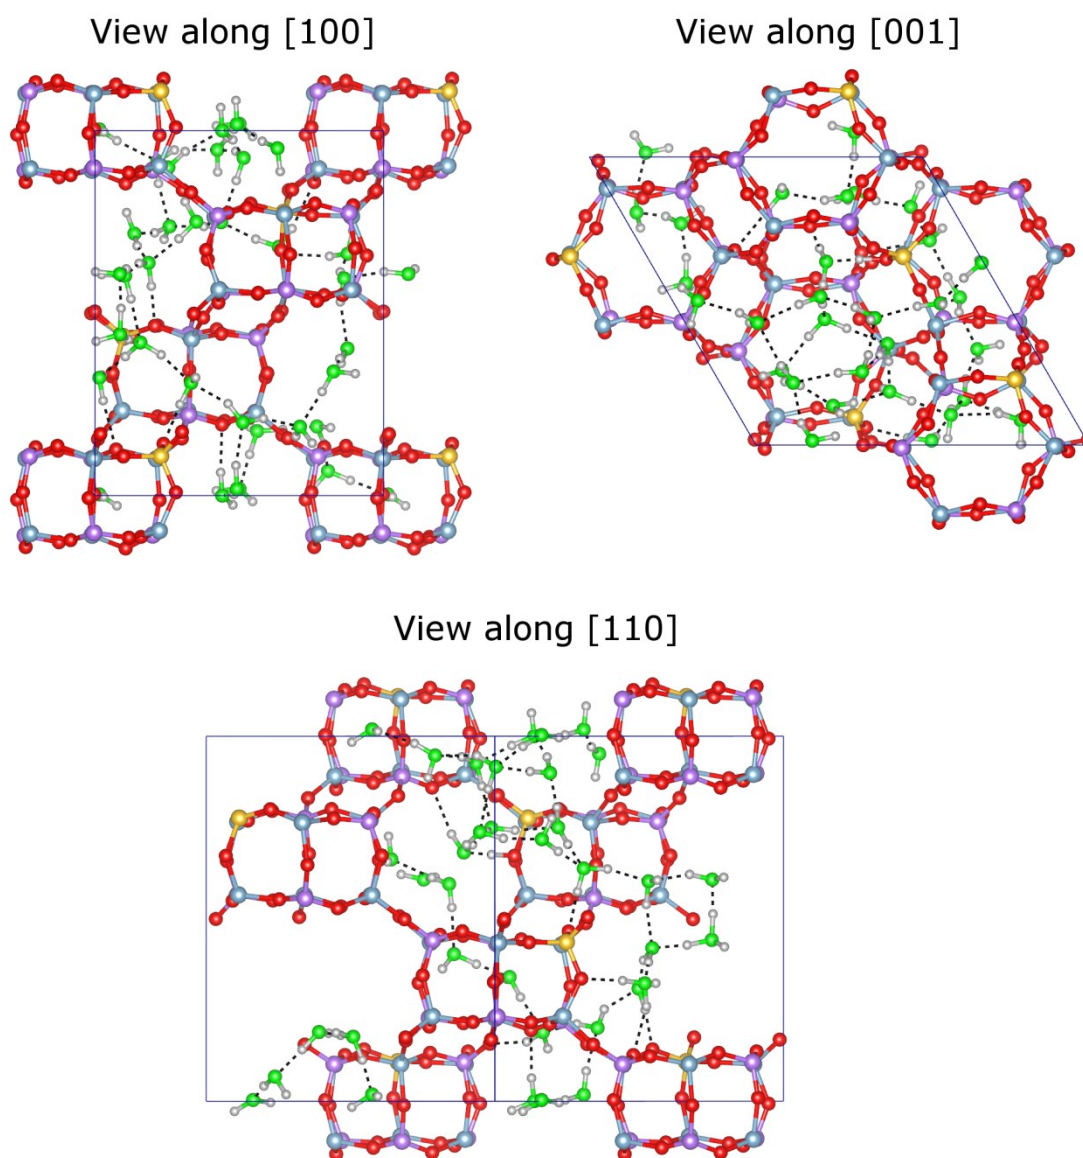

SAPO-34\_Si\_island + 30 H<sub>2</sub>O (snapshot 3)

View along [100]

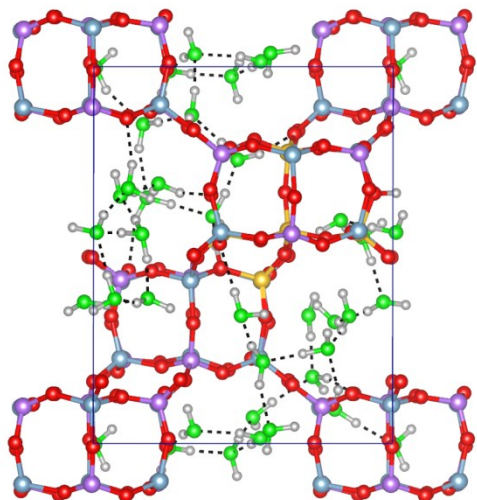

View along [001]

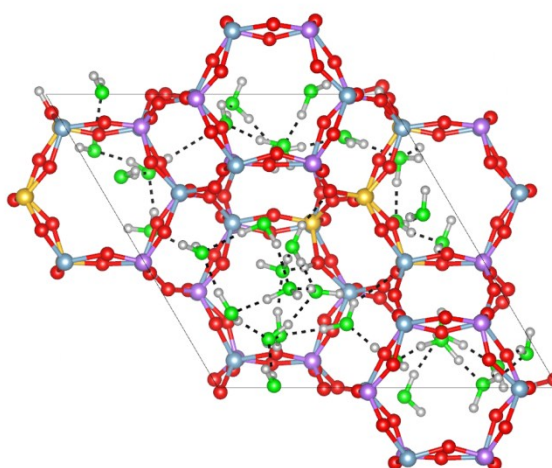

View along [110]

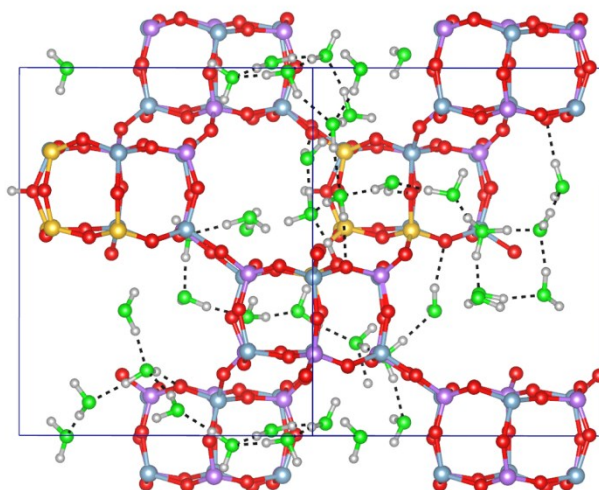

SAPO-34\_desilicated + 30 H<sub>2</sub>O (snapshot 2)

View along [100]

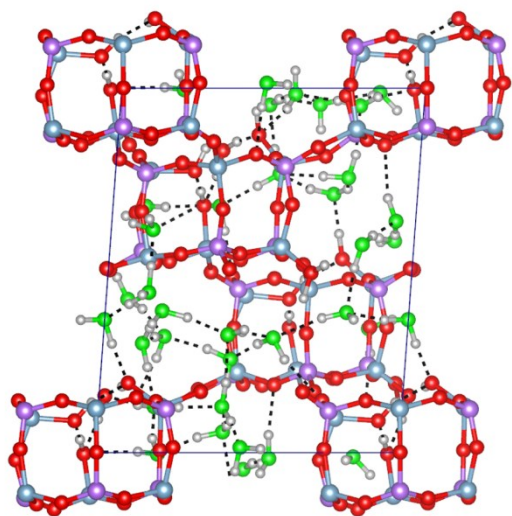

View along [001]

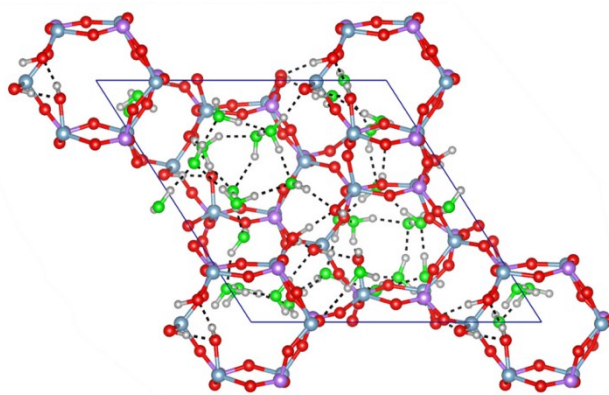

### (3) Typical CASTEP input files

#### \*.param file

```
comment : SAPO-34_O1_opti (including cell relaxation)
task : GeometryOptimization
xc_functional : PBE
sedc_apply: true
sedc_scheme: TS
spin_polarized : false
opt_strategy : Speed
page_wvfns : 0
cut_off_energy : 700.0000000000000000
grid_scale : 2.0000000000000000
fine_grid_scale : 2.0000000000000000
finite_basis_corr : 2
finite_basis_npoints : 3
elec_energy_tol : 1.0000000000000000e-010
max_scf_cycles : 250
fix_occupancy : true
metals_method : dm
mixing_scheme : Pulay
mix_charge_amp : 0.5000000000000000
mix_charge_gmax : 1.5000000000000000
mix_history_length : 20
nextra_bands : 0
geom_energy_tol : 5.0000000000000000e-006
geom_force_tol : 0.0100000000000000
geom_stress_tol : 0.0200000000000000
geom_disp_tol : 5.0000000000000000e-004
geom_max_iter : 1000
geom_method : BFGS
fixed_npw : false
geom_modulus_est : 100.0000000000000000 GPa
calculate ELF : false
calculate_stress : true
popn_calculate : true
calculate_hirshfeld : true
calculate_densdiff : false
popn_bond_cutoff : 3.0000000000000000
pdos_calculate_weights : false
num_dump_cycles : 0
num_backup_iter : 5
write_cif_structure: true
write_cell_structure: true
```

**\*.cell file**

%BLOCK LATTICE\_CART

|                   |                   |                   |
|-------------------|-------------------|-------------------|
| 11.9555244896803  | -6.90252528242006 | 0.000000000000000 |
| 0.000000000000000 | 13.8050505648401  | 0.000000000000000 |
| 0.000000000000000 | 0.000000000000000 | 15.1491383582027  |

%ENDBLOCK LATTICE\_CART

%BLOCK cell\_constraints

|   |   |   |
|---|---|---|
| 1 | 1 | 3 |
| 0 | 0 | 0 |

%ENDBLOCK cell\_constraints

%BLOCK positions\_frac

|   |                    |                    |                   |
|---|--------------------|--------------------|-------------------|
| H | 0.009400893152441  | 0.361611902007518  | 0.004985665497903 |
| H | -0.361611902007518 | -0.352211008855076 | 0.671652332164571 |
| H | 0.352211008855076  | -0.009400893152441 | 0.338318998831236 |
| O | 0.464327171772902  | 0.211131442763573  | 0.456314151016584 |
| O | 0.229110597118638  | 0.422582339173060  | 0.459421212025192 |
| O | 0.315662078842782  | 0.003922377498440  | 0.503987020351902 |
| O | -0.071527570434649 | 0.988927005292726  | 0.989401429019657 |
| O | 0.112207589345765  | 0.536810898337829  | 0.796632557358482 |
| O | -0.106610273823177 | 0.752240073247104  | 0.768337289310215 |
| O | -0.019580905182944 | 0.338386444144691  | 0.829115180556433 |
| O | 0.606640032830059  | 0.347033352642810  | 0.317894954570451 |
| O | -0.217373839970518 | 0.877728895827369  | 0.133450863536924 |
| O | 0.557296158460006  | 0.091610232697507  | 0.117151167080286 |
| O | -0.348466148809293 | 0.679513957433761  | 0.167010805167200 |
| O | 0.267584501337897  | 0.671102606051775  | 0.663624974307154 |
| O | -0.114669949277058 | 0.798146556125217  | 0.544511202839707 |
| O | 0.115792420759003  | 0.576641245371058  | 0.550161909506399 |
| O | 0.024858402066615  | 0.988841176650867  | 0.497170346643883 |
| O | 0.399912439857593  | -0.002857536762943 | 0.007995809618133 |
| O | 0.551019429260249  | 0.115434924528071  | 0.867463501302560 |
| O | -0.231952349469032 | 0.913449003910857  | 0.881822786231570 |
| O | 0.684087083964761  | 0.309464971811532  | 0.825015517983278 |
| O | 0.077138217015639  | 0.332295590314264  | 0.346160753680090 |
| O | 0.219441714735567  | 0.465111733056584  | 0.207155127741646 |
| O | 0.434797045418817  | 0.246198573552324  | 0.223744755185324 |
| O | 0.348751786261864  | 0.665570052985066  | 0.176390012396595 |
| O | -0.286506406034049 | 0.658145330366696  | 0.670265347949700 |
| O | -0.211131442763573 | 0.253195729009329  | 1.122980817683251 |
| O | -0.422582339173060 | -0.193471742054422 | 1.126087878691859 |
| O | -0.003922377498440 | 0.311739701344342  | 1.170653687018570 |
| O | -0.988927005292726 | -1.060454575727375 | 1.656068095686324 |
| O | -0.536810898337830 | -0.424603308992065 | 1.463299224025150 |
| O | -0.752240073247104 | -0.858850347070281 | 1.435003955976882 |
| O | -0.338386444144691 | -0.357967349327635 | 1.495781847223099 |
| O | -0.347033352642810 | 0.259606680187249  | 0.984561621237117 |
| O | -0.877728895827369 | -1.095102735797886 | 0.800117530203591 |



|    |                    |                    |                   |
|----|--------------------|--------------------|-------------------|
| O  | -0.091610232697507 | 0.465685925762499  | 0.783817833746953 |
| O  | -0.679513957433761 | -1.027980106243052 | 0.833677471833867 |
| O  | -0.671102606051775 | -0.403518104713878 | 1.330291640973822 |
| O  | -0.798146556125217 | -0.912816505402275 | 1.211177869506374 |
| O  | -0.576641245371058 | -0.460848824612055 | 1.216828576173066 |
| O  | -0.988841176650867 | -0.963982774584251 | 1.163837013310551 |
| O  | 0.002857536762943  | 0.402769976620536  | 0.674662476284800 |
| O  | -0.115434924528071 | 0.435584504732178  | 1.534130167969227 |
| O  | -0.913449003910857 | -1.145401353379891 | 1.548489452898236 |
| O  | -0.309464971811532 | 0.374622112153228  | 1.491682184649945 |
| O  | -0.332295590314264 | -0.255157373298625 | 1.012827420346757 |
| O  | -0.465111733056584 | -0.245670018321017 | 0.873821794408313 |
| O  | -0.246198573552324 | 0.188598471866493  | 0.890411421851991 |
| O  | -0.665570052985066 | -0.316818266723202 | 0.843056679063262 |
| O  | -0.658145330366696 | -0.944651736400745 | 1.336932014616368 |
| O  | -0.253195729009329 | -0.464327171772902 | 0.789647484349917 |
| O  | 0.193471742054422  | -0.229110597118638 | 0.792754545358524 |
| O  | -0.311739701344342 | -0.315662078842782 | 0.837320353685235 |
| O  | 1.060454575727375  | 0.071527570434649  | 1.322734762352990 |
| O  | 0.424603308992065  | -0.112207589345765 | 1.129965890691816 |
| O  | 0.858850347070281  | 0.106610273823177  | 1.101670622643548 |
| O  | 0.357967349327635  | 0.019580905182944  | 1.162448513889765 |
| O  | -0.259606680187249 | -0.606640032830059 | 0.651228287903784 |
| O  | 1.095102735797886  | 0.217373839970518  | 0.466784196870258 |
| O  | -0.465685925762499 | -0.557296158460006 | 0.450484500413619 |
| O  | 1.027980106243053  | 0.348466148809293  | 0.500344138500533 |
| O  | 0.403518104713878  | -0.267584501337897 | 0.996958307640487 |
| O  | 0.912816505402275  | 0.114669949277058  | 0.877844536173040 |
| O  | 0.460848824612055  | -0.115792420759003 | 0.883495242839731 |
| O  | 0.963982774584251  | -0.024858402066615 | 0.830503679977216 |
| O  | -0.402769976620536 | -0.399912439857593 | 0.341329142951466 |
| O  | -0.435584504732178 | -0.551019429260249 | 1.200796834635893 |
| O  | 1.145401353379891  | 0.231952349469032  | 1.215156119564902 |
| O  | -0.374622112153228 | -0.684087083964761 | 1.158348851316611 |
| O  | 0.255157373298625  | -0.077138217015639 | 0.679494087013423 |
| O  | 0.245670018321017  | -0.219441714735567 | 0.540488461074978 |
| O  | -0.188598471866493 | -0.434797045418817 | 0.557078088518657 |
| O  | 0.316818266723202  | -0.348751786261864 | 0.509723345729928 |
| O  | 0.944651736400746  | 0.286506406034049  | 1.003598681283034 |
| Al | 0.333039405421623  | 0.560372234743437  | 0.440077513024831 |
| Al | -0.004623095333817 | 0.890611726463268  | 0.765271010774867 |
| Al | -0.340321130370054 | 0.231272758143320  | 0.096776998923156 |
| Al | 0.007574619662869  | 0.440188876177873  | 0.564250316938522 |
| Al | 0.665950683337393  | 0.773210699822171  | 0.900971362420237 |
| Al | 0.333190057400229  | 0.107012646501225  | 0.227984510861082 |
| Al | -0.560372234743437 | -0.227332829321813 | 1.106744179691497 |
| Al | -0.890611726463268 | -0.895234821797084 | 1.431937677441533 |
| Al | -0.231272758143320 | -0.571593888513374 | 0.763443665589823 |
| Al | -0.440188876177873 | -0.432614256515003 | 1.230916983605188 |
| Al | -0.773210699822171 | -0.107260016484778 | 1.567638029086904 |

|    |                    |                    |                   |
|----|--------------------|--------------------|-------------------|
| Al | -0.107012646501225 | 0.226177410899004  | 0.894651177527749 |
| Al | 0.227332829321813  | -0.333039405421623 | 0.773410846358164 |
| Al | 0.895234821797084  | 0.004623095333817  | 1.098604344108199 |
| Al | 0.571593888513374  | 0.340321130370054  | 0.430110332256489 |
| Al | 0.432614256515003  | -0.007574619662869 | 0.897583650271855 |
| Al | 0.107260016484777  | -0.665950683337393 | 1.234304695753570 |
| Al | -0.226177410899004 | -0.333190057400229 | 0.561317844194415 |
| Si | -0.234154743985973 | 0.657728874245963  | 0.777016875598720 |
| Si | -0.657728874245963 | -0.891883618231937 | 1.443683542265388 |
| Si | 0.891883618231937  | 0.234154743985973  | 1.110350208932054 |
| P  | 0.236116482445369  | 0.669755148638883  | 0.566409850013761 |
| P  | -0.107203597464283 | 0.996590780565982  | 0.895320781654570 |
| P  | 0.558532339781856  | 0.339423827498928  | 0.225696172205492 |
| P  | 0.107816719689173  | 0.330044625916336  | 0.442600155364228 |
| P  | 0.436320275870833  | -0.000422029905173 | 0.103442276035612 |
| P  | -0.669755148638884 | -0.433638666193514 | 1.233076516680428 |
| P  | -0.996590780565982 | -1.103794378030265 | 1.561987448321237 |
| P  | -0.339423827498928 | 0.219108512282928  | 0.892362838872158 |
| P  | -0.330044625916336 | -0.222227906227163 | 1.109266822030895 |
| P  | 0.000422029905173  | 0.436742305776005  | 0.770108942702279 |
| P  | 0.433638666193514  | -0.236116482445369 | 0.899743183347094 |
| P  | 1.103794378030265  | 0.107203597464283  | 1.228654114987903 |
| P  | -0.219108512282928 | -0.558532339781856 | 0.559029505538824 |
| P  | 0.222227906227163  | -0.107816719689173 | 0.775933488697562 |
| P  | -0.436742305776006 | -0.436320275870833 | 0.436775609368945 |

%ENDBLOCK positions\_frac

FIX\_COM : false

%BLOCK species\_mass

AMU

|    |             |
|----|-------------|
| H  | 2.00000000  |
| O  | 15.99899960 |
| Al | 26.98200035 |
| Si | 28.08499908 |
| P  | 30.97400093 |

%ENDBLOCK species\_mass

```

%BLOCK species_pot
H 1|0.8|3.675|7.35|11.025|10UU(qc=6.4)[]
O 2|1.3|16.537|18.375|20.212|20UU:21UU(qc=7.5)[]
Al 2|2|3.675|5.512|7.717|30UU:31UU:32LGG[]
Si 2|1.8|3.675|5.512|7.35|30UU:31UU:32LGG[]
P 2|1.8|3.675|5.512|6.982|30UU:31UU:32LGG[]
%ENDBLOCK species_pot

```

```

%BLOCK species_lcao_states
H 1
O 2
Al 2
Si 2
P 2

```

```

%ENDBLOCK species_lcao_states

```

```

%BLOCK symmetry_ops

```

```

# Symm. op. 1 E
1.0000000000000000 0.0000000000000000 0.0000000000000000
0.0000000000000000 1.0000000000000000 0.0000000000000000
0.0000000000000000 -0.0000000000000000 1.0000000000000000
0.0000000000000000 0.0000000000000000 0.0000000000000000
# Symm. op. 2 3_2
-0.5000000000000000 0.866025403784438 -0.0000000000000000
-0.866025403784439 -0.5000000000000000 -0.0000000000000000
0.0000000000000000 -0.0000000000000000 1.0000000000000000
0.0000000000000000 0.0000000000000000 0.6666666666666671
# Symm. op. 3 3_1
-0.5000000000000000 -0.866025403784438 -0.0000000000000000
0.866025403784439 -0.5000000000000000 0.0000000000000000
0.0000000000000000 0.0000000000000000 1.0000000000000000
0.0000000000000000 0.0000000000000000 0.333333333333329

```

```

%ENDBLOCK symmetry_ops

```

```

kpoint_mp_grid: 1 1 1

```
